# Supplementary material for: Photolysis of Tp′Rh(CNneopentyl)(PhNCNneopentyl) in the presence of ketones and esters: kinetic and thermodynamic selectivity for activation of different aliphatic C–H bonds
Source: Royal Society of Chemistry journal article supplement (doi:10.1039/c9dt01802f), 2019-01-01
Supplement: c9dt01802f1.pdf [file c9dt01802f1.pdf]

## Supporting Information

# Photolysis of Tp'Rh(CNneopentyl)(PhNCNneopentyl) in the presence of ketones and esters: kinetic and thermodynamic selectivity for activation of different aliphatic C-H bonds

*Astrid M. Parsons and William D. Jones\**

Department of Chemistry, University of Rochester, Rochester, NY, 14627

### Table of Contents

|                                                                             |     |
|-----------------------------------------------------------------------------|-----|
| 1. <sup>1</sup> H NMR spectra of photolysis experiments                     | S2  |
| 2. Plots of the reductive elimination of Tp'Rh(CNneopentyl)(R)(H) complexes | S7  |
| 3. Activation of Substrates Bearing C-Br Bonds                              | S18 |
| 4. Summary of kinetic and thermodynamic selectivity                         | S20 |
| 5. Gaussian Input                                                           | S22 |
| 6. X, Y, Z Coordinates Used for BDE (DFT) Calculations                      | S22 |

## 1. $^1\text{H}$ NMR spectra of photolysis experiments

General Comments: Most photolysis experiments yielded more than one C-H activated product. Additionally, all photolysis experiments were accompanied by *o*-, *m*-, and *p*-carbodiimide C-H activation products (amounts vary from reaction to reaction). As a result, the  $^1\text{H}$  NMR spectrum (0-8 ppm) is crowded with many overlapping peaks, making the assignment of any C-H activated products difficult. For this reason, only the hydride resonances will be reported.

NOTE: \* denotes *o*-, *m*-, and *p*-carbodiimide C-H activated products.

### Activation of diethyl ketone

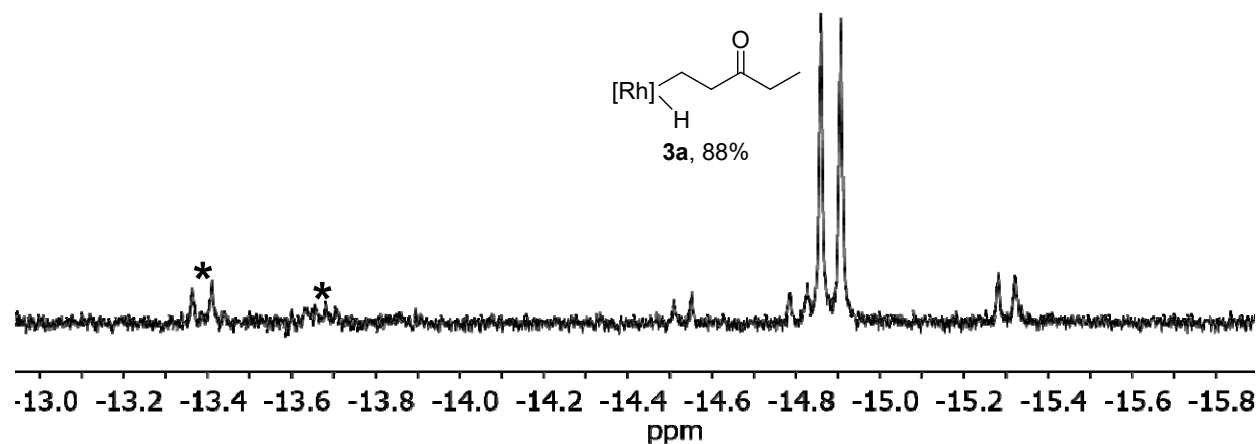

**Figure S1.**  $^1\text{H}$  NMR of hydride region for C-H activated diethyl ketone, **3a**  $\delta$  -14.89 ( $J_{\text{Rh-H}} = 24.0$  Hz). Small quantities of *o*-, *m*-, and *p*-carbodiimide activation products were observed ( $\delta$  -13.39). Products at  $\delta$  -14.53, and -15.31 are assigned to diastereomers arising from  $\alpha$ - $\text{CH}_2$  activation. The doublet at  $\delta$  -14.81 is assigned to activation of an acetone impurity.

### Activation of ethyl methyl ketone

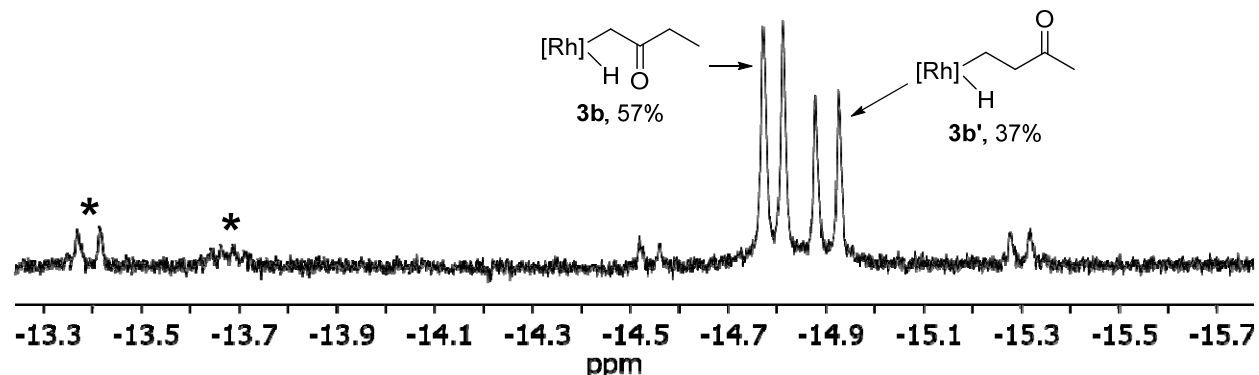

**Figure S2.**  $^1\text{H}$  NMR of hydride region for C-H activated ethyl methyl ketone, **3b**  $\delta$  -14.79 ( $J_{\text{Rh-H}} = 20.5$  Hz) and **3b'**  $\delta$  -14.90 ( $J_{\text{Rh-H}} = 24.0$  Hz). Small quantities of *o*-, *m*-, and *p*-carbodiimide activation products were observed ( $\delta$  -13.39 and -13.68). Products at  $\delta$  -15.28 and -14.54 are assigned to diastereomers from  $\alpha$ -keto  $\text{CH}_2$  activation.

### Activation of cyclopentanone

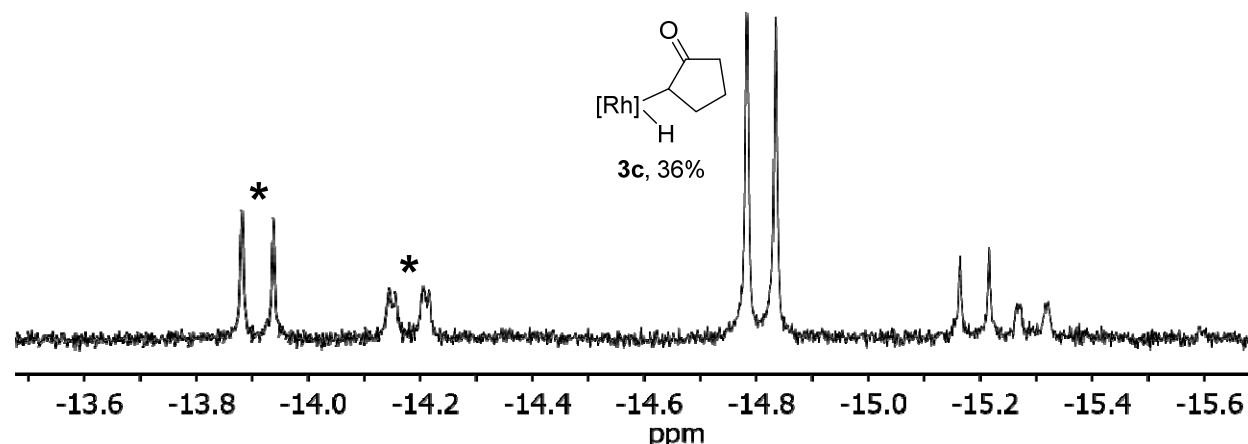

**Figure S3.** <sup>1</sup>H NMR of hydride region for C-H activated cyclopentanone, **3c**  $\delta$  -14.82 ( $J_{\text{Rh-H}} = 20.4$  Hz). Small quantities of *o*-, *m*-, and *p*-carbodiimide activation products were observed ( $\delta$  -13.90, -14.17, -14.18). Products at  $\delta$  -15.19 ( $J_{\text{Rh-H}} = 20.9$  Hz) and -15.29 ( $J_{\text{Rh-H}} = 23.2$  Hz) were not assigned, but likely arise from  $\beta$ -keto C-H activation. The chemical shifts for these minor products are in the region seen for similar  $\beta$ -derivatives with chlorocyclopentane.<sup>1</sup>

### Activation of cyclopropyl methyl ketone

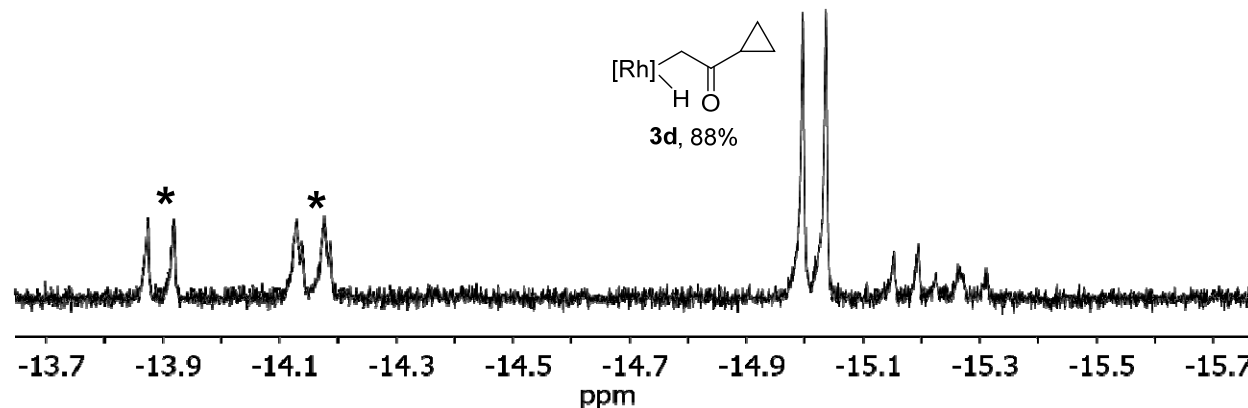

**Figure S4.** <sup>1</sup>H NMR of hydride region for C-H activated cyclopropyl methyl ketone, **3d**  $\delta$  -15.02 ( $J_{\text{Rh-H}} = 19.5$  Hz). Small quantities of *o*-, *m*-, and *p*-carbodiimide activation products were observed ( $\delta$  -13.90, -14.15, -14.16). Product at  $\delta$  -15.17 was not assigned, but likely arise from cyclopropyl C-H activation.

<sup>1</sup> A. J. Vetter, R. D. Rieth, W. W. Brennessel, W. D. Jones, *J. Am. Chem. Soc.* 2009, **131**, 10742–10752.

### Activation of 4-phenyl-2-butanone

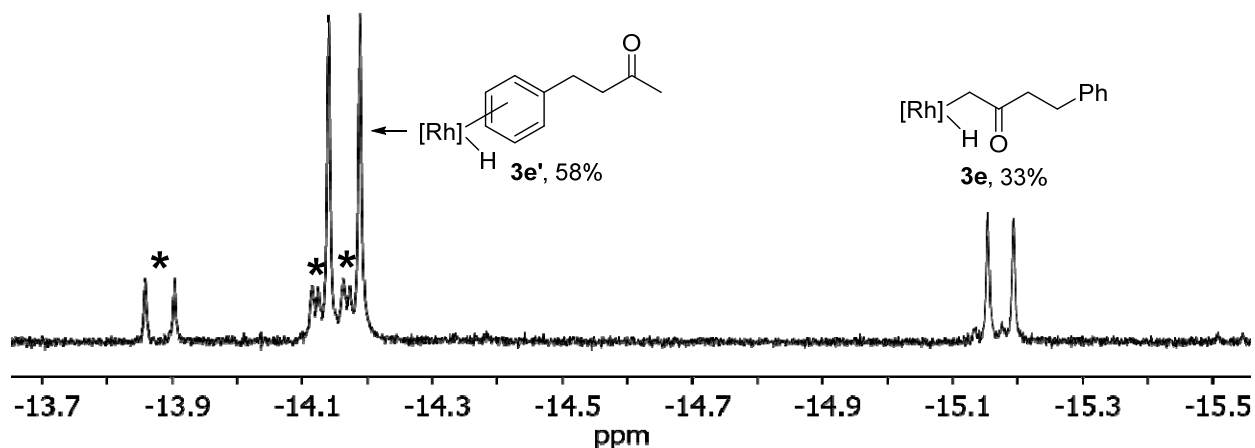

**Figure S5.**  $^1\text{H}$  NMR of hydride region for C-H activated 4-phenyl-2-butanone, **3e**  $\delta$  -15.17 ( $J_{\text{Rh-H}} = 19.5$  Hz). Small quantities of *o*-, *m*-, and *p*-carbodiimide activation products were observed ( $\delta$  -13.88, -14.12, -14.17). The product at  $\delta$  -14.17 ( $J_{\text{Rh-H}} = 24.0$  Hz) was assigned to an arene C-H activation product.

### Activation of 4-chloro-2-butanone

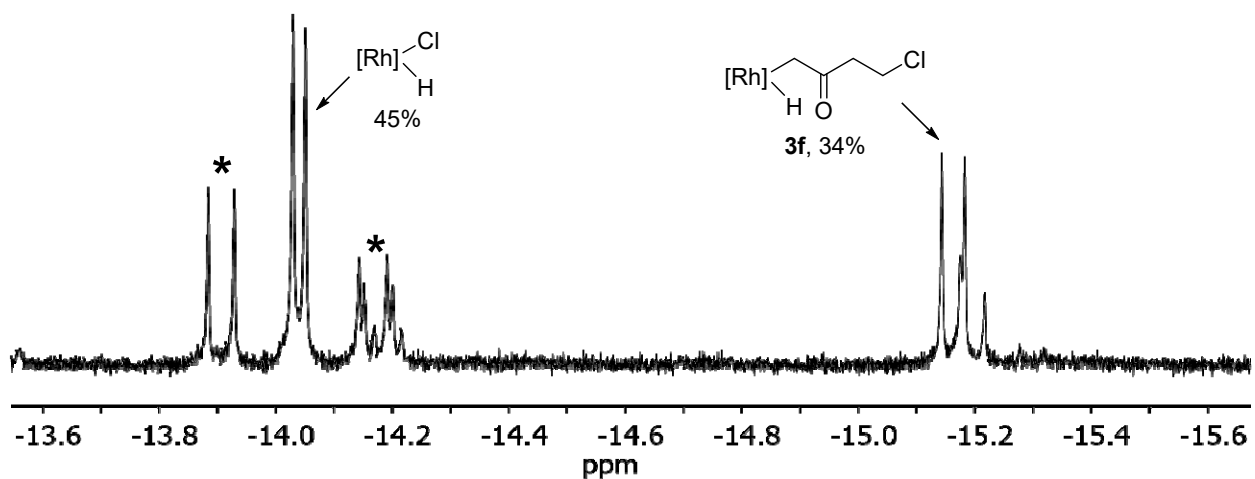

**Figure S6.**  $^1\text{H}$  NMR of hydride region for C-H activated 4-chloro-2-butanone, **3f**  $\delta$  -15.16 ( $J_{\text{Rh-H}} = 19.5$  Hz). Small quantities of *o*-, *m*-, and *p*-carbodiimide activation products were observed ( $\delta$  -13.91, -14.15, -14.20). Product at  $\delta$  -14.04 ( $J_{\text{Rh-H}} = 10.5$  Hz) was assigned to  $\text{Tp}'\text{Rh}(\text{CNR})\text{HCl}$ . The hydride doublet at  $\delta$  -15.19 ( $J_{\text{Rh-H}} = 20.8$  Hz) was not visible after 5 h, and could be due to  $\alpha$ -keto  $\text{CH}_2$  activation that leads to  $\beta$ -chlorine elimination.

### Formation of $\text{Tp}'\text{Rh}(\text{CNR})(\text{H})(\text{Cl})$ in $\text{C}_6\text{D}_{12}$ :

The identity of  $\text{Tp}'\text{Rh}(\text{CNR})(\text{H})(\text{Cl})$  has been previously reported in  $\text{C}_6\text{D}_6$  from the photolysis of **1** with 2-chloropropane.<sup>2</sup> In order to confirm the identity of  $\delta$  -14.04 ( $J_{\text{Rh-H}} = 10.5$  Hz) in the activation of 4-chloro-2-butanone, activation of 2-chloropropane in  $\text{C}_6\text{D}_{12}$  was performed. Indeed, the chemical shift of  $\text{Tp}'\text{Rh}(\text{CNR})(\text{H})(\text{Cl})$  generated from photolysis of **1** with 2-chloropropane is shifted in  $\text{C}_6\text{D}_{12}$ .

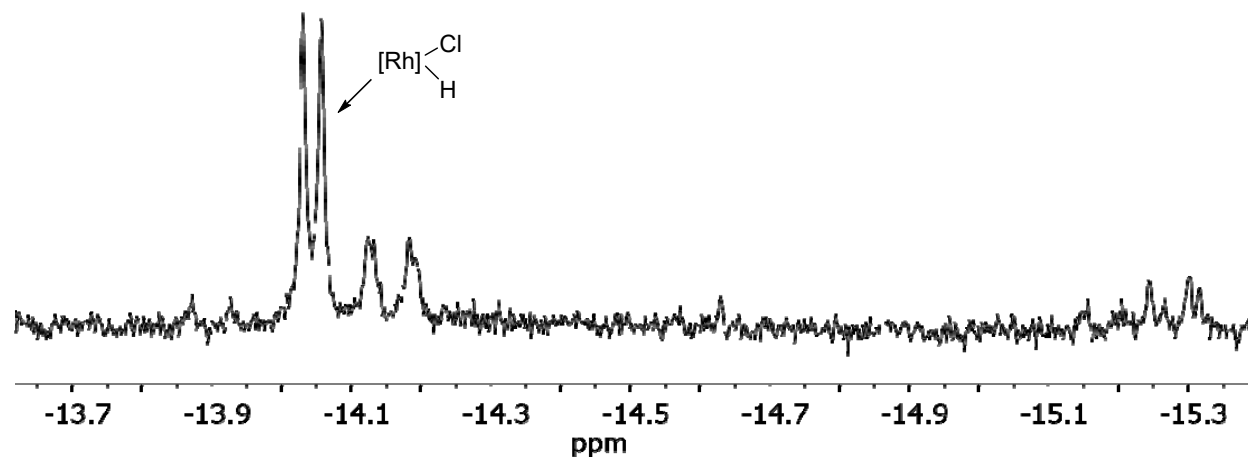

### Activation of methyl acetate

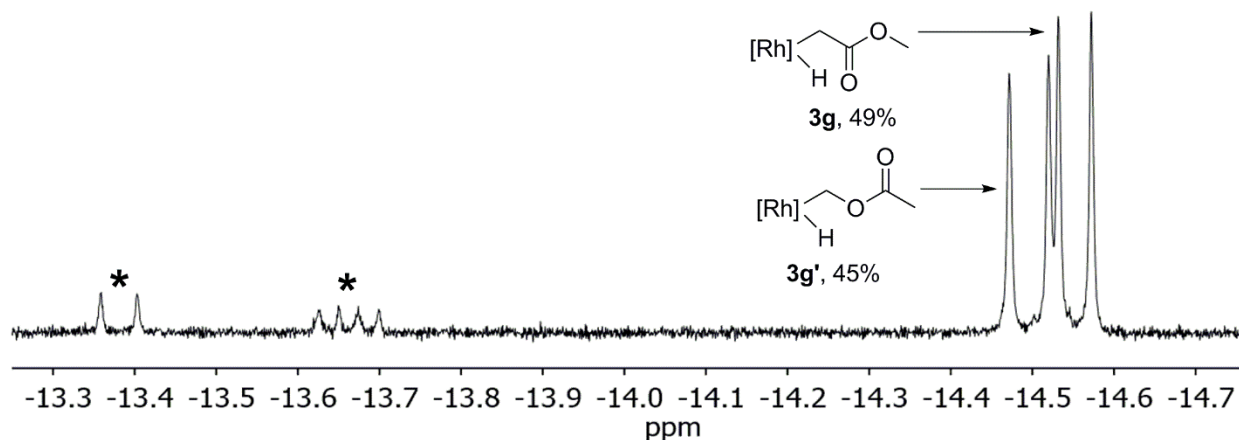

**Figure S7.**  $^1\text{H}$  NMR of hydride region for C-H activated methyl acetate, **3g**  $\delta$  -14.55 ( $J_{\text{Rh-H}} = 20.2$  Hz) and **3g'**  $\delta$  -14.50 ( $J_{\text{Rh-H}} = 24.1$  Hz). Small quantities of *o*-, *m*-, and *p*-carbodiimide activation products were observed ( $\delta$  -13.39, -13.64, and -13.69).

<sup>2</sup> A. J. Vetter, W. D. Jones, *Polyhedron* **2004**, *23*, 413-417.

### Activation of methyl butyrate

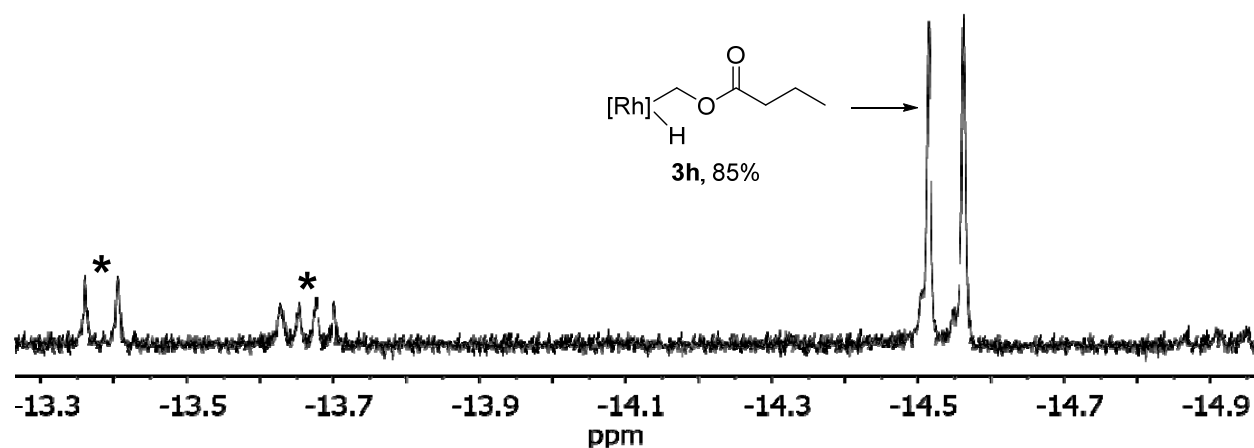

**Figure S8.** <sup>1</sup>H NMR of hydride region for C-H activated methyl butyrate, **3h**  $\delta$  -14.54 ( $J_{\text{Rh-H}} = 23.9$  Hz). Small quantities of *o*-, *m*-, and *p*-carbodiimide activation products were observed ( $\delta$  -13.39, -13.64, and -13.69).

### Activation of dimethyl carbonate

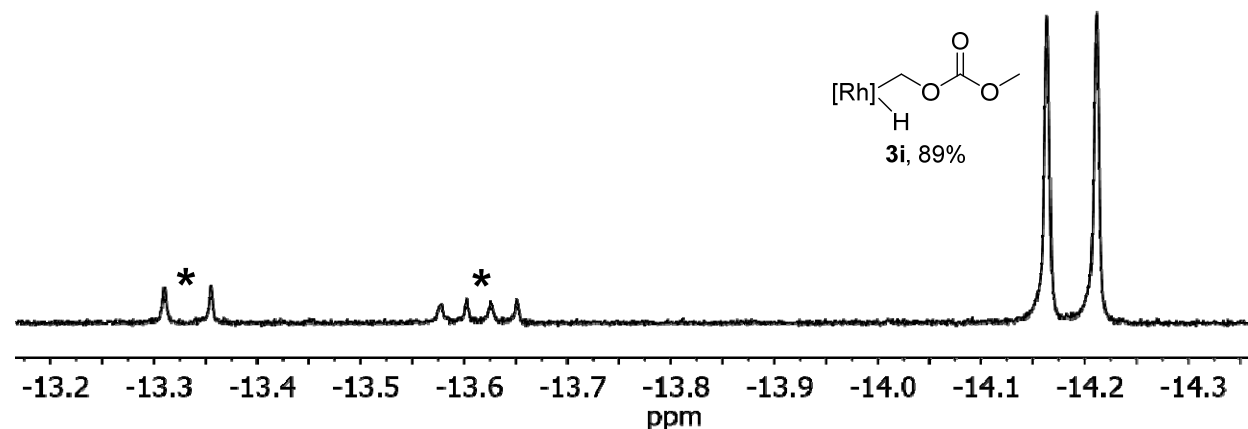

**Figure S9.** <sup>1</sup>H NMR of hydride region for C-H activated dimethyl carbonate, **3i**  $\delta$  -14.24 ( $J_{\text{Rh-H}} = 24.1$  Hz). Small quantities of *o*-, *m*-, and *p*-carbodiimide activation products were observed ( $\delta$  -13.39, -13.64, and -13.69).

## 2. Plots of the reductive elimination of Tp'Rh(CNneopentyl)(R)(H) complexes

Note: All hydride integrations were measured relative to hexamethyldisiloxane as an internal standard.

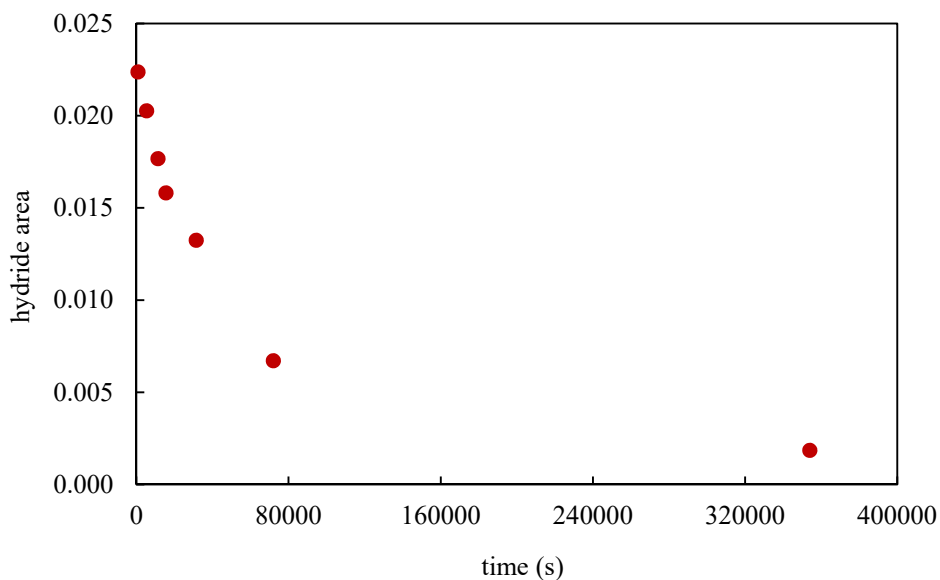

**Figure S10.** Reductive elimination of diethyl ketone (**2a**) from **3a** at room temperature (24 °C) in C<sub>6</sub>D<sub>6</sub>.

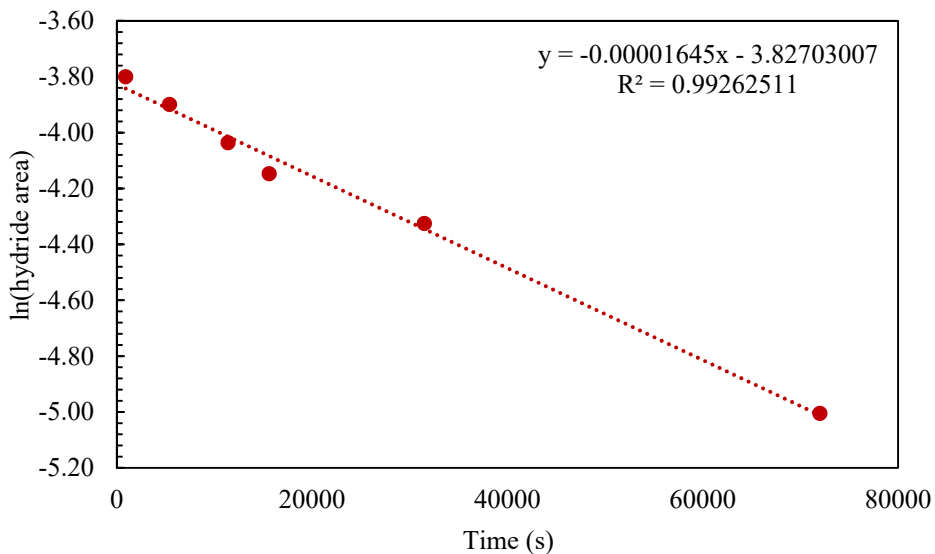

**Figure S11.** Kinetic data for the reductive elimination of diethyl ketone (**2a**) from **3a** at room temperature (24 °C) in C<sub>6</sub>D<sub>6</sub>.

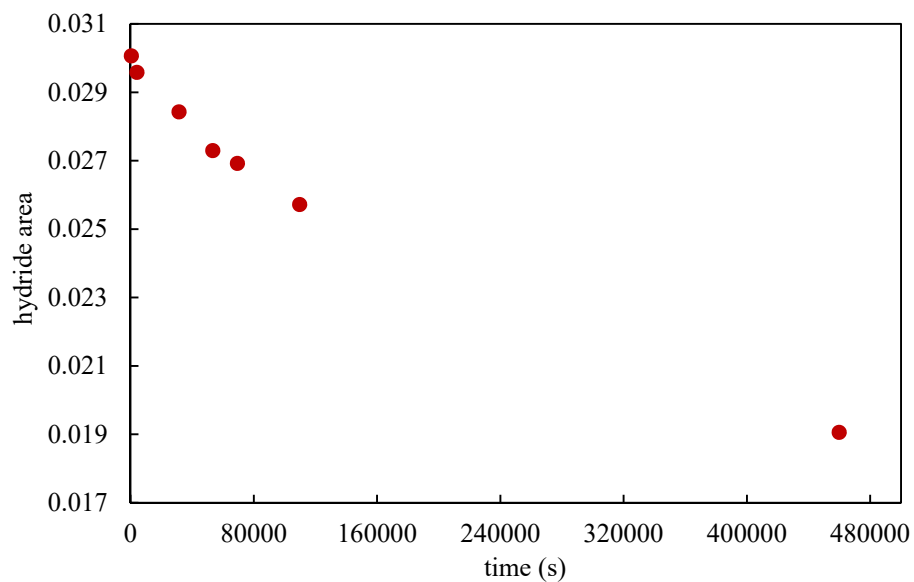

**Figure S12.** Reductive elimination of ethyl methyl ketone (**2b**) from **3b** at room temperature (24 °C) in C<sub>6</sub>D<sub>6</sub>.

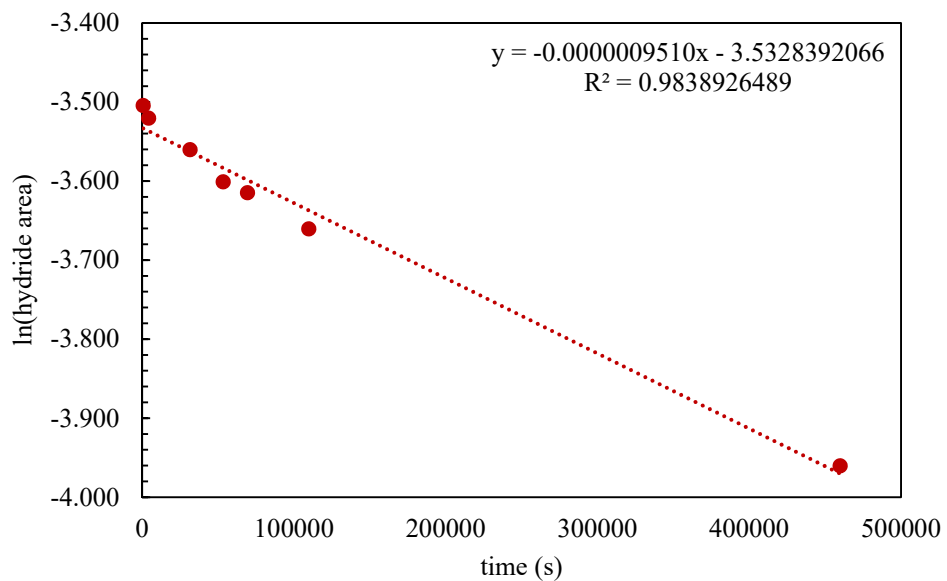

**Figure S13.** Kinetic data for the reductive elimination of ethyl methyl ketone (**2b**) from **3b** at room temperature (24 °C) in C<sub>6</sub>D<sub>6</sub>.



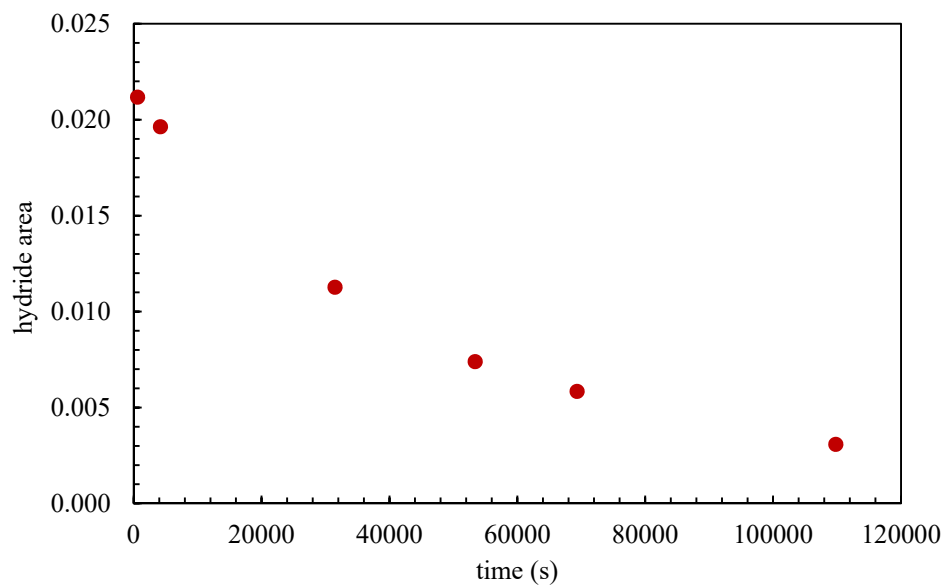

**Figure S14.** Reductive elimination of ethyl methyl ketone (**2b'**) from **3b'** at room temperature (24 °C) in C<sub>6</sub>D<sub>6</sub>.

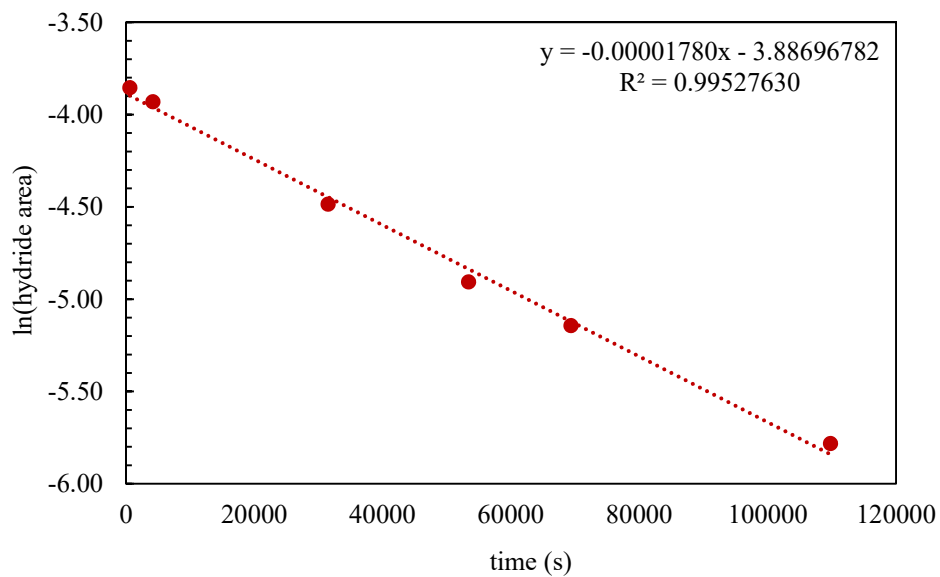

**Figure S15.** Kinetic data for the reductive elimination of ethyl methyl ketone (**2b'**) from **3b'** at room temperature (24 °C) in C<sub>6</sub>D<sub>6</sub>.

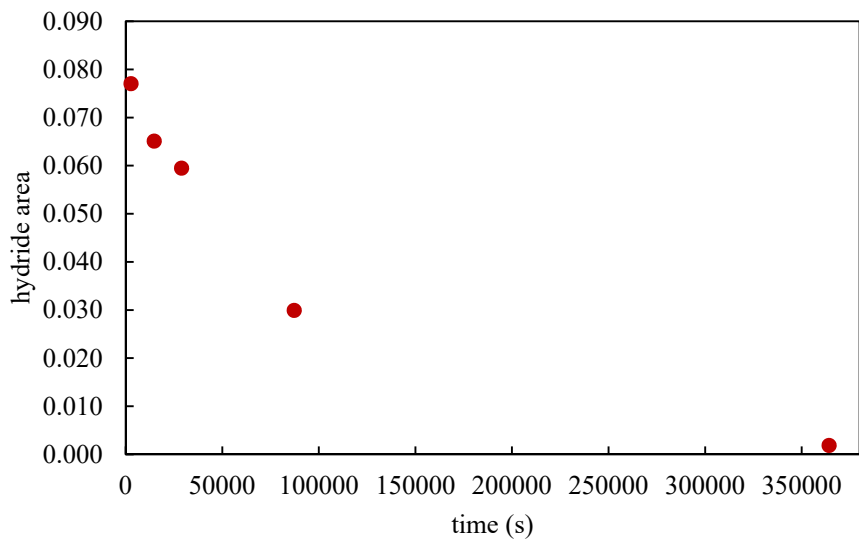

**Figure S16.** Reductive elimination of cyclopentanone (**2c**) from **3c** at 40 °C in C<sub>6</sub>D<sub>12</sub>.

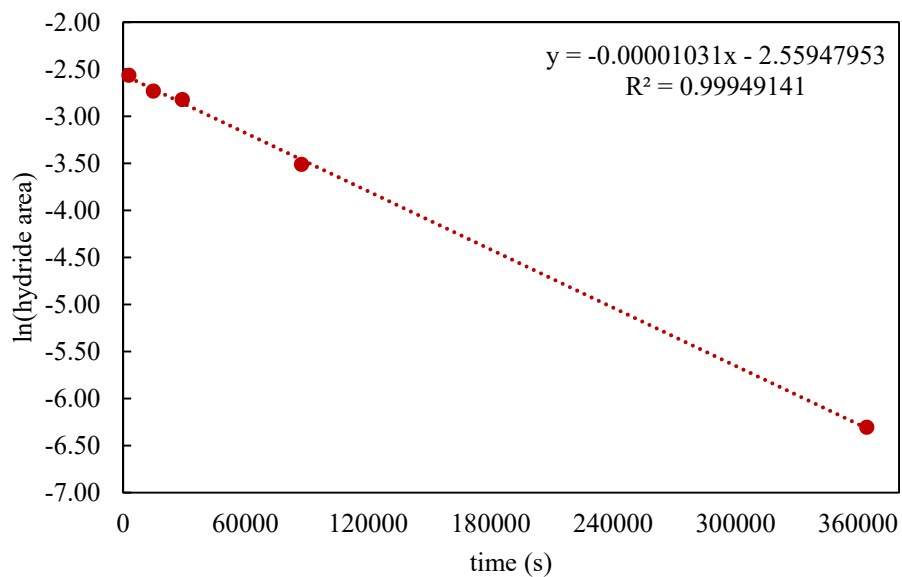

**Figure S17.** Kinetic data for the reductive elimination of cyclopentanone (**2c**) from **3c** at 40 °C in C<sub>6</sub>D<sub>12</sub>.

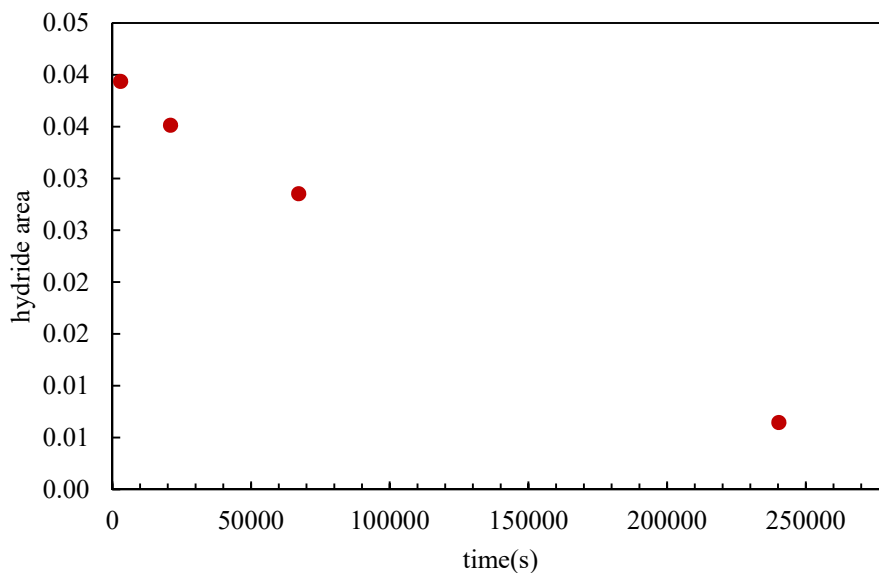

**Figure S18.** Reductive elimination of cyclopropyl methyl ketone (**2d**) from **3d** at 70 °C in C<sub>6</sub>D<sub>12</sub>.

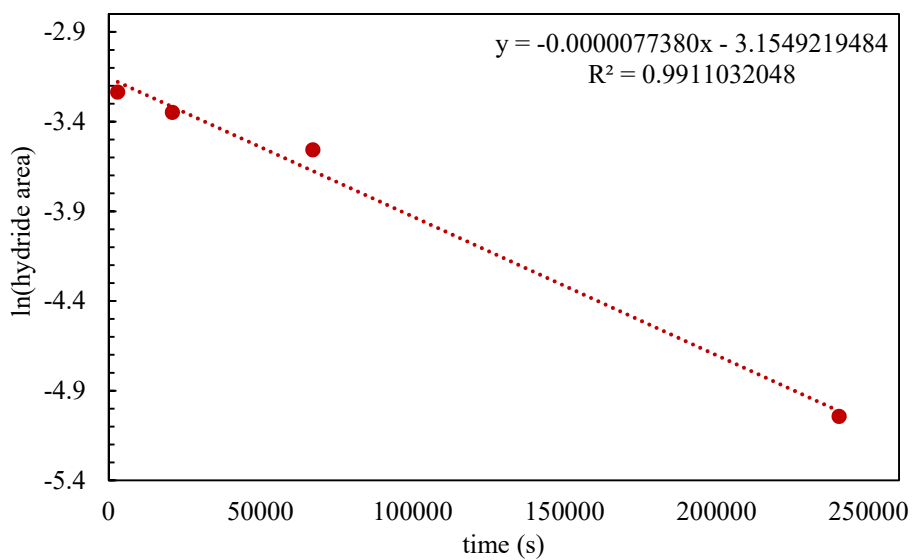

**Figure S19.** Kinetic data for the reductive elimination of cyclopropyl methyl ketone (**2d**) from **3d** at 70 °C in C<sub>6</sub>D<sub>12</sub>.

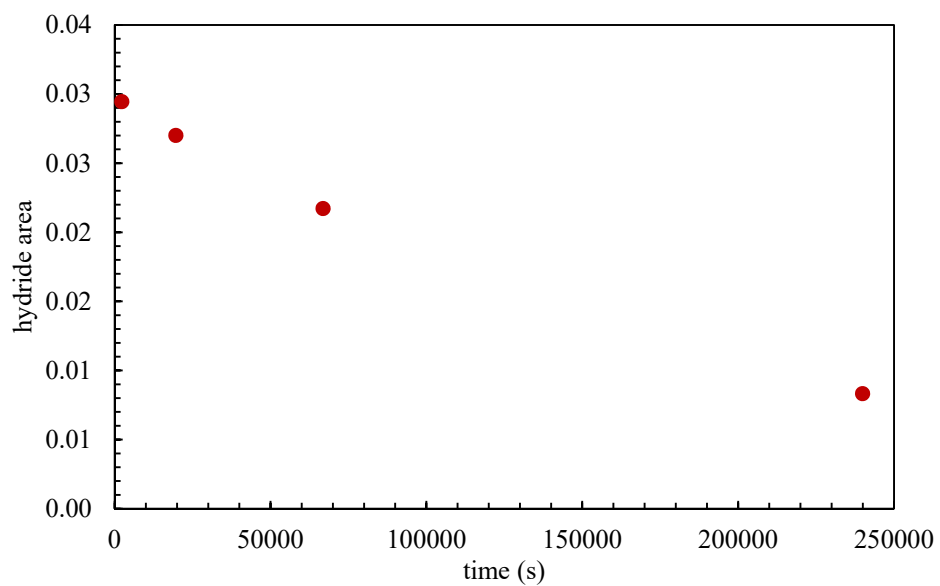

**Figure S20.** Reductive elimination of 4-phenyl-2-butanone (**2e**) from **3e** at 70 °C in C<sub>6</sub>D<sub>12</sub>.

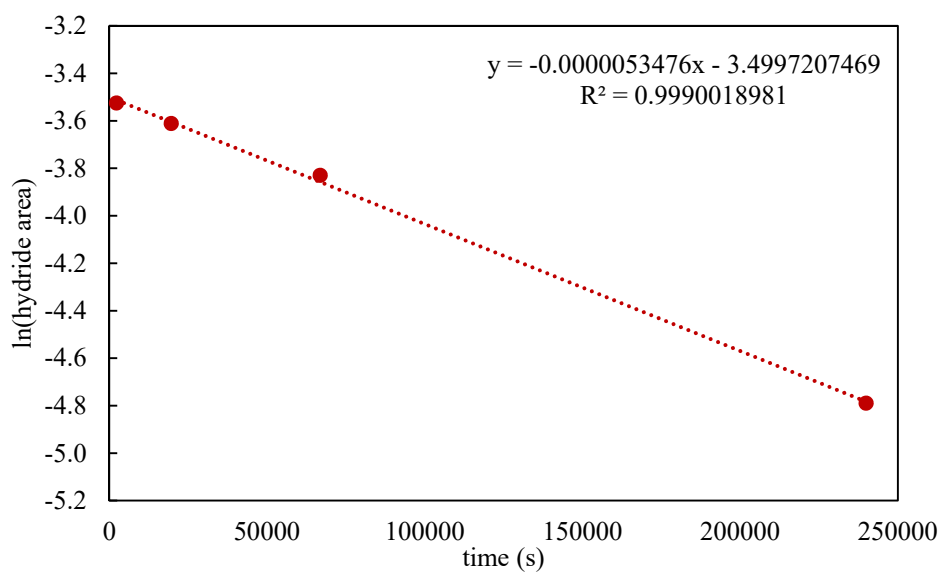

**Figure S21.** Kinetic data for the reductive elimination of 4-phenyl-2-butanone (**2e**) from **3e** at 70 °C in C<sub>6</sub>D<sub>12</sub>.

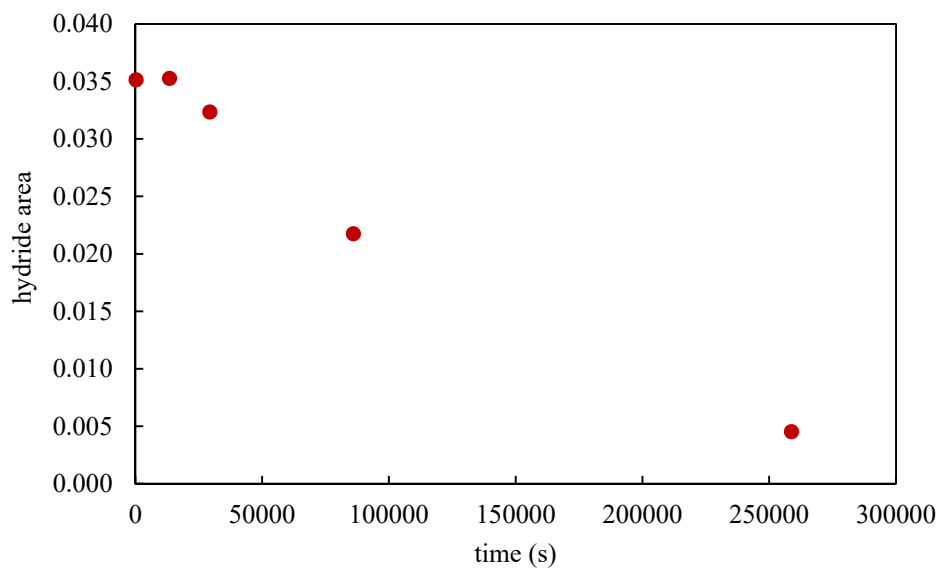

**Figure S22.** Reductive elimination of 4-chloro-2-butanone (**2f**) from **3f** at room temperature (24 °C) in C<sub>6</sub>D<sub>12</sub>.

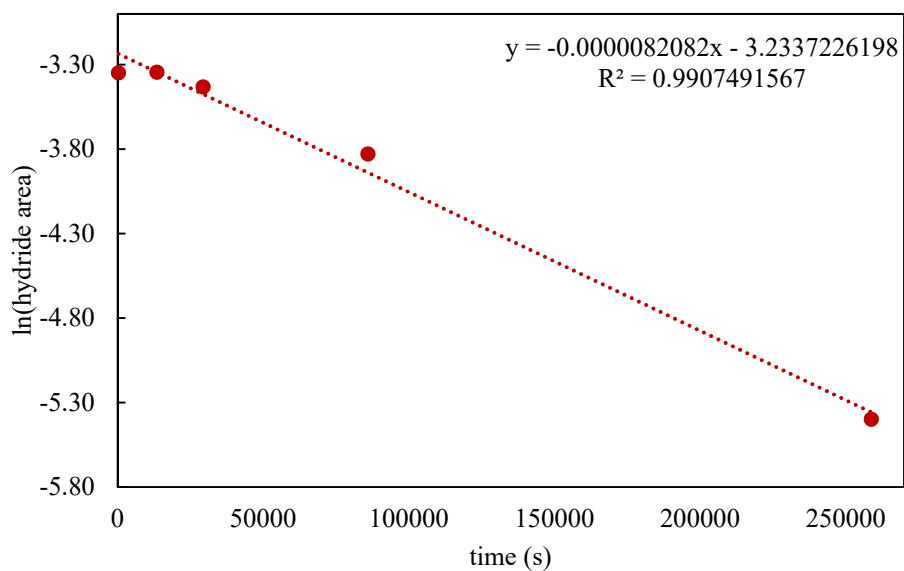

**Figure S23.** Kinetic data for the reductive elimination of 4-chloro-2-butanone (**2f**) from **3f** at room temperature (24 °C) in C<sub>6</sub>D<sub>12</sub>.

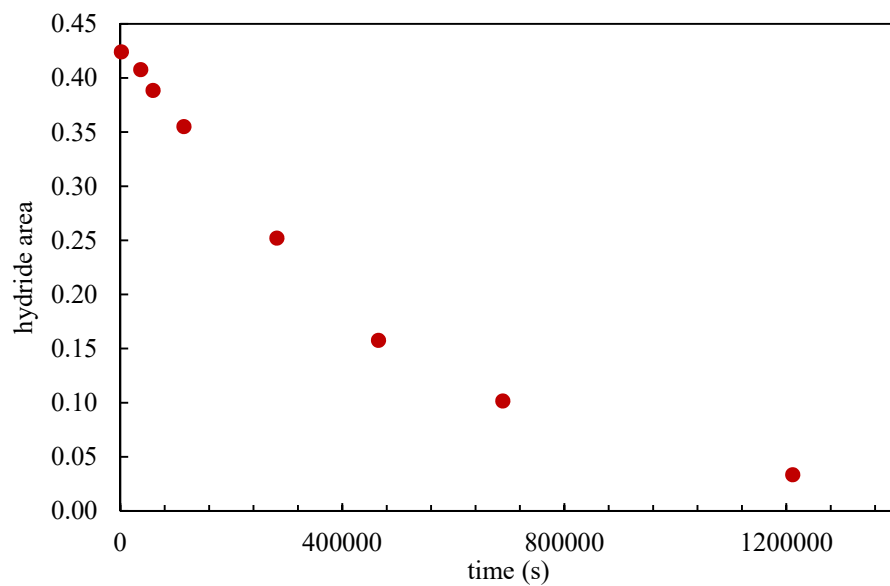

**Figure S24.** Reductive elimination of methyl acetate (**2g**) from **3g** at 60 °C in C<sub>6</sub>D<sub>6</sub>.

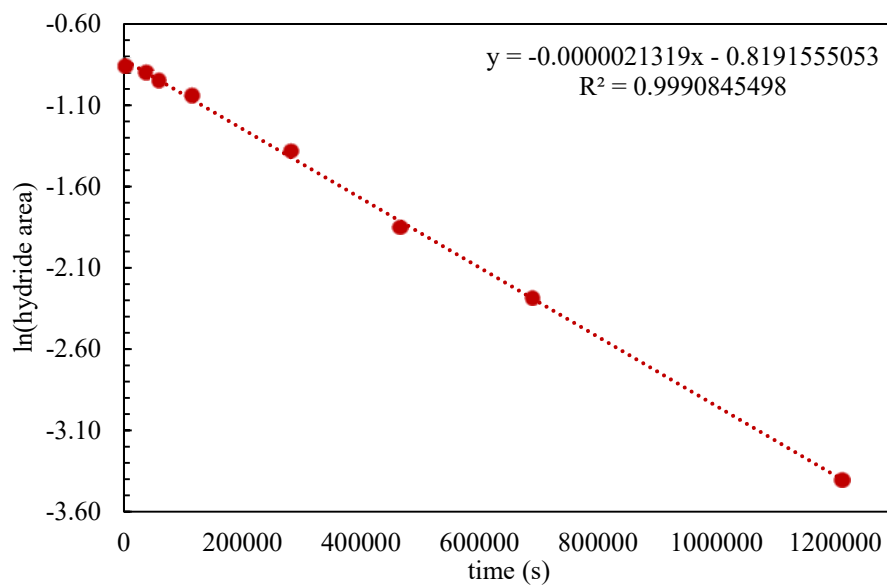

**Figure S25.** Kinetic data for the reductive elimination of methyl acetate (**2g**) from **3g** at 60 °C in C<sub>6</sub>D<sub>6</sub>.

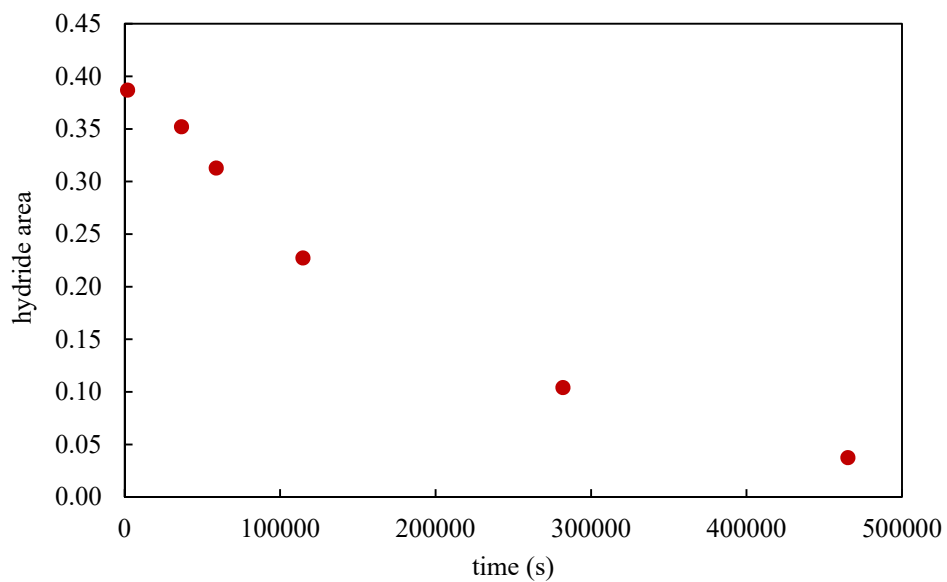

**Figure S26.** Reductive elimination of methyl acetate (**2g'**) from **3g'** at 60 °C in C<sub>6</sub>D<sub>6</sub>.

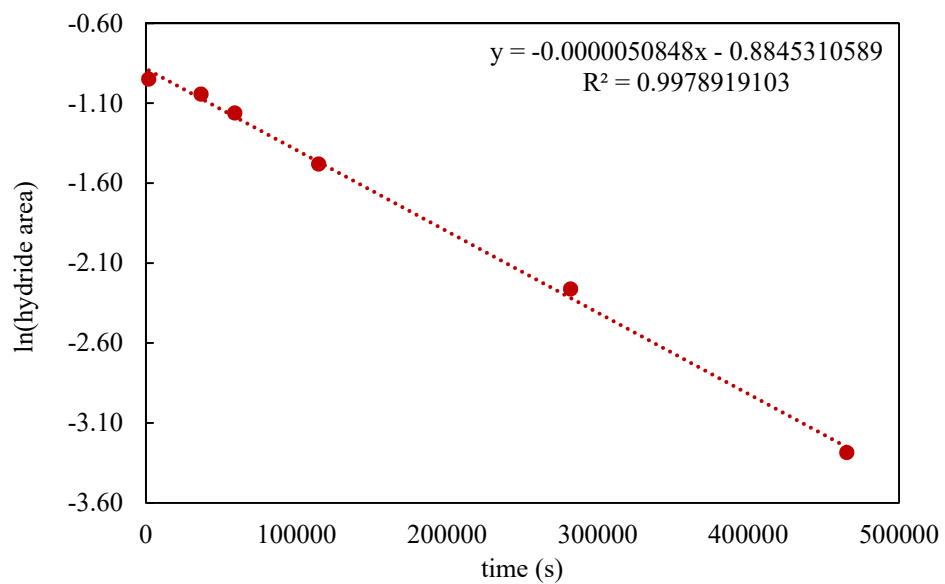

**Figure S27.** Kinetic data for the reductive elimination of methyl acetate (**2g'**) from **3g'** at 60 °C in C<sub>6</sub>D<sub>6</sub>.

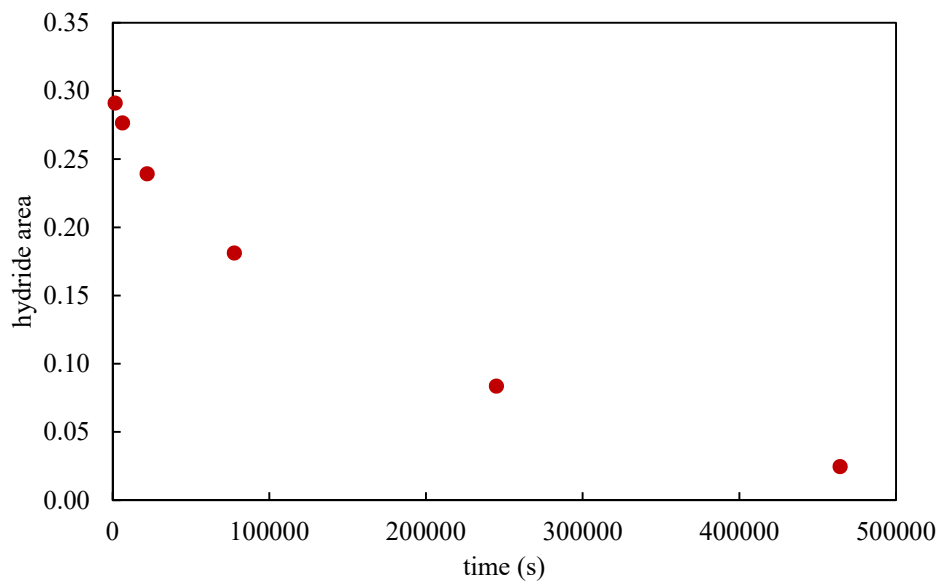

**Figure S28.** Reductive elimination of methyl butyrate (**2h**) from **3h** at 60 °C in C<sub>6</sub>D<sub>6</sub>.

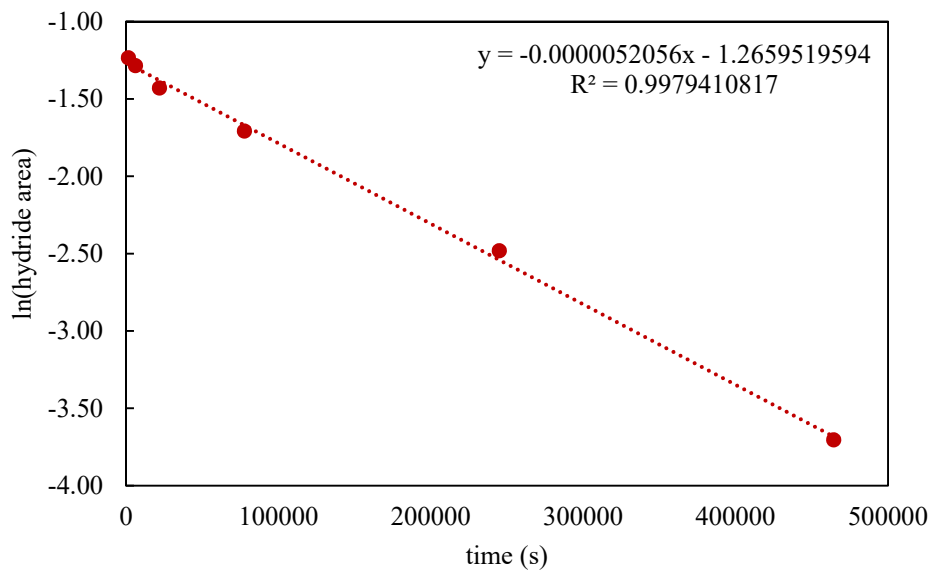

**Figure S29.** Kinetic data for the reductive elimination of methyl butyrate (**2h**) from **3h** at 60 °C in C<sub>6</sub>D<sub>6</sub>.



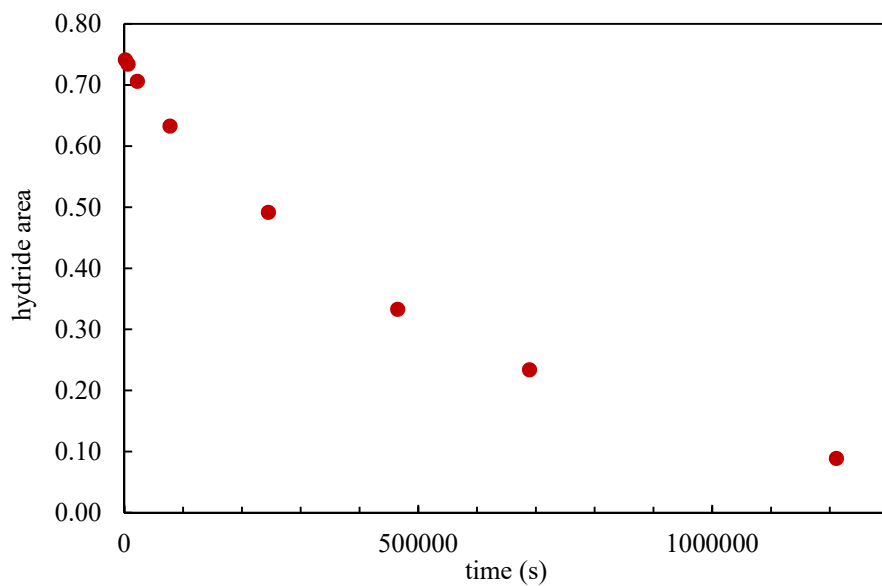

**Figure S30.** Reductive elimination of dimethyl carbonate (**2i**) from **3i** at 60 °C in C<sub>6</sub>D<sub>6</sub>.

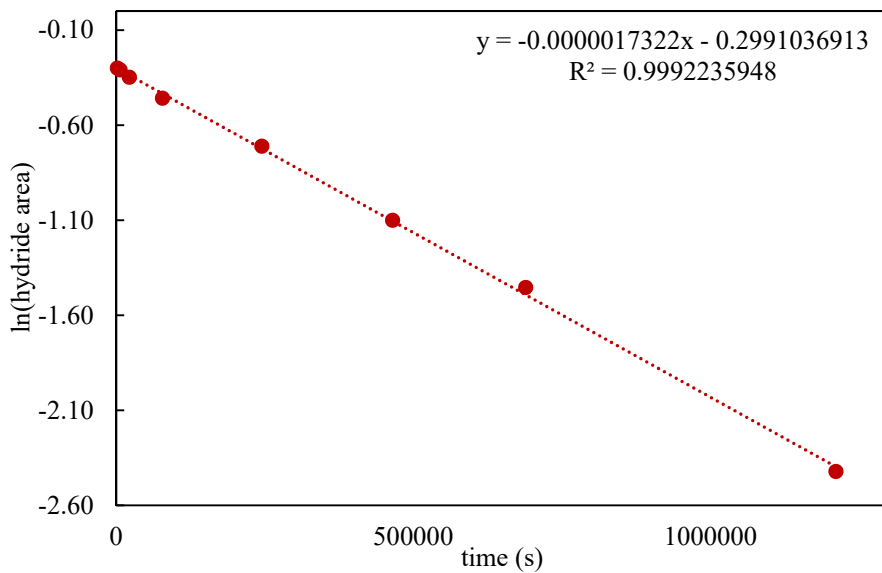

**Figure S31.** Kinetic data for the reductive elimination of dimethyl carbonate (**2i**) from **3i** at 60 °C in C<sub>6</sub>D<sub>6</sub>.

### 3. Activation of Substrates Bearing C-Br Bonds

#### Activation of 1-bromo-2-butanone

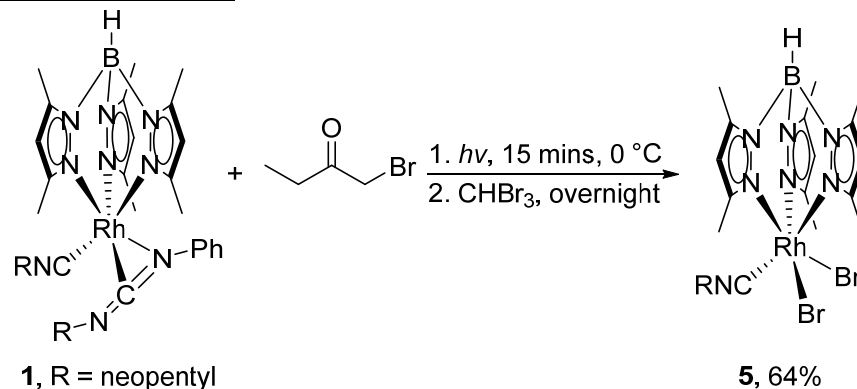

The reaction was setup in a nitrogen filled glovebox. To an oven-dried 1-dram vial was added **1** (35.0 mg, 0.050 mmol). Next, 1.0 mL of 1-bromo-2-butanone was added and the reaction mixture was capped. The sample was removed from the glovebox and irradiated at 0 °C for 15 min. After 15 min, the reaction mixture was removed from the ice bath and brought inside the glovebox. Bromoform (0.25 mL, 2.8 mmol) and a Teflon-coated stir-bar were added and the reaction mixture was stirred overnight. The reaction was concentrated *in vacuo* and the resulting residue was purified by column chromatography (7:3 hexane: ethyl acetate,  $R_f = 0.47$ ) to afford **5** as a yellow solid (21 mg, 67% yield).

$^1\text{H NMR}$  (400 MHz;  $\text{C}_6\text{D}_6$ ):  $\delta$  5.57 (s, 1H), 5.51 (s, 2H), 3.29 (s, 3H), 2.77 (s, 2H), 2.76 (s, 6H), 2.12 (s, 3H), 2.03 (s, 6H), 0.86 (s, 1H), 0.85 (s, 9H).

#### Activation of 3-bromo-2-butanone

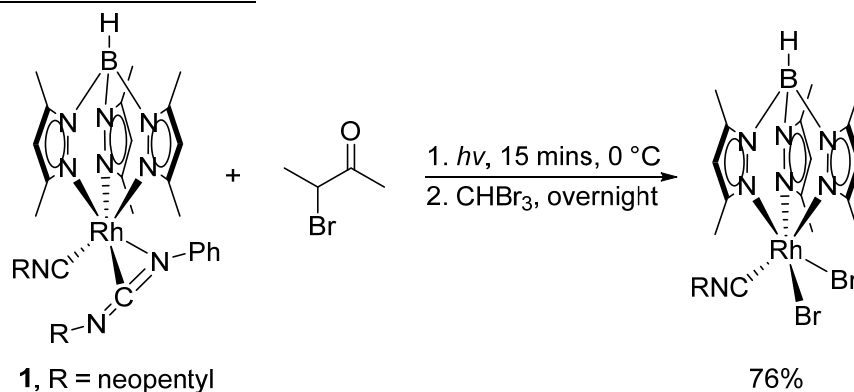

The reaction was setup in a nitrogen filled glovebox. To an oven-dried 1-dram vial was added **1** (35.0 mg, 0.050 mmol). Next, 1.0 mL of 3-bromo-2-butanone was added and the reaction mixture was capped. The sample was removed from the glovebox and irradiated at 0 °C for 15 min. After 15 min, the reaction mixture was removed from the ice bath and brought inside the glovebox. Bromoform (0.25 mL, 2.8 mmol) and a Teflon-coated stir-bar were added and the reaction mixture was stirred overnight. The reaction was concentrated *in vacuo* and the resulting residue was purified by column chromatography (7:3 hexane: ethyl acetate,  $R_f = 0.49$ ) to afford **5** as a yellow solid (25 mg, 76% yield).

$^1\text{H NMR}$  (400 MHz;  $\text{C}_6\text{D}_6$ ):  $\delta$  5.57 (s, 1H), 5.51 (s, 2H), 3.29 (s, 3H), 2.77 (s, 2H), 2.76 (s, 6H), 2.12 (s, 3H), 2.03 (s, 6H), 0.86 (s, 1H), 0.85 (s, 9H).

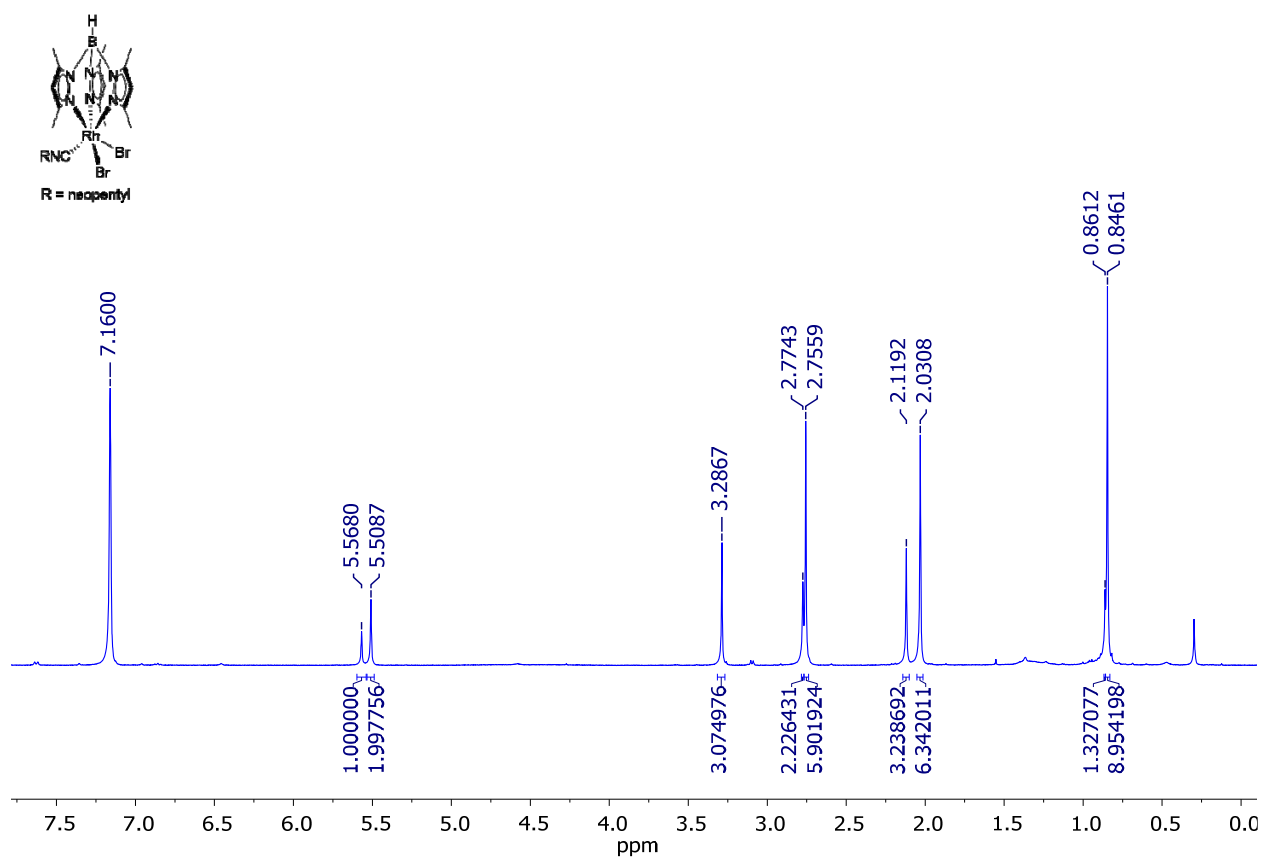

Figure S32.  $^1\text{H}$  NMR analysis of  $\text{Tp}'\text{Rh}(\text{CNneopentyl})\text{Br}_2$ .

#### 4. Summary of Kinetic and Thermodynamic Selectivity

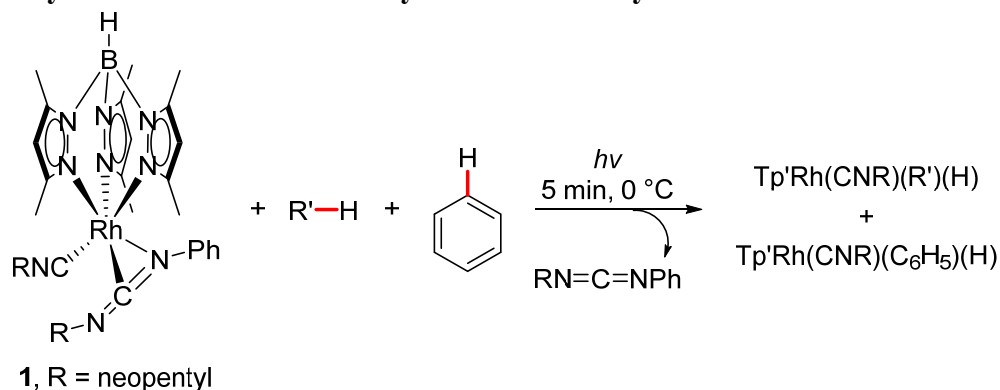

Reactions were setup in a nitrogen filled glovebox. To an oven-dried 5 mm J Young NMR tube was added **1** (6.9 mg, 0.010 mmol). Next, benzene (0.25 mL) and substrate (0.25 mL) were added and the NMR tube was capped. The sample was removed from the glovebox and irradiated at 0 °C for 5 minutes. After 5 minutes, the reaction was removed from the ice bath and the integrated area ratio (benzene: substrate) was determined by <sup>1</sup>H NMR spectroscopy.

**Table S1. Kinetic Selectivity Data<sup>a</sup>**

| entry | benzene:<br>substrate | integrated area ratio<br>( <i>I</i> <sub>2</sub> / <i>I</i> <sub>1</sub> ) | substrate ratio<br>( <i>n</i> <sub>1</sub> / <i>n</i> <sub>2</sub> ) <sup>b</sup> | <i>k</i> <sub>1</sub> / <i>k</i> <sub>2</sub> <sup>c</sup> |
|-------|-----------------------|----------------------------------------------------------------------------|-----------------------------------------------------------------------------------|------------------------------------------------------------|
| 1     | benzene: <b>2a</b>    | 1.63                                                                       | 0.84                                                                              | 1.37(7)                                                    |
| 2     | benzene: <b>2b</b>    | 1.97                                                                       | 1.00                                                                              | 1.97(10)                                                   |
| 3     | benzene: <b>2b'</b>   | 1.77                                                                       | 1.00                                                                              | 1.67(9)                                                    |
| 4     | benzene: <b>2c</b>    | 20.64                                                                      | 1.01                                                                              | 20.85(104)                                                 |
| 5     | benzene: <b>2d</b>    | 11.15                                                                      | 0.90                                                                              | 10.06(50)                                                  |
| 6     | benzene: <b>2e</b>    | 4.09                                                                       | 0.60                                                                              | 2.44(12)                                                   |
| 7     | benzene: <b>2f</b>    | -                                                                          | -                                                                                 | -                                                          |
| 8     | benzene: <b>2g</b>    | 5.42                                                                       | 1.13                                                                              | 6.11(31)                                                   |
| 9     | benzene: <b>2g'</b>   | 7.51                                                                       | 1.13                                                                              | 7.51(38)                                                   |
| 10    | benzene: <b>2h</b>    | 22.09                                                                      | 0.79                                                                              | 17.36(87)                                                  |
| 11    | benzene: <b>2i</b>    | 3.03                                                                       | 1.06                                                                              | 3.21(15)                                                   |

<sup>a</sup>Each sample was irradiated for 5 minutes at 0 °C. <sup>b</sup>The substrate ratio was determined from added amounts in mmol. <sup>c</sup>Errors in rate ratio estimated at 5% for proton NMR integrations.

NOTE: Attempts to obtain kinetic selectivity data for 4-chloro-2-butanone were unsuccessful.

**Table S2. Summary of Thermodynamic Data** (All values are in kcal/mol)**Data for plot of M-R vs R-H bond strengths-Tp’Rh(CNneopentyl)(R)(H)**

$$D_{\text{rel}}(\text{R-H}) = [\Delta\text{H}(\text{Rh-R}) - \Delta\text{H}(\text{Rh-Ph})] = \Delta G^\circ + RT \ln(6/\#\text{H}) + [\Delta\text{H}(\text{R-H}) - \Delta\text{H}(\text{Ph-H})]$$

$$\Delta G^\circ \approx \Delta H^\circ - RT \ln(6/\#\text{H})$$

$$\Delta S^\circ \approx R \ln(6/\#\text{H})$$

$$\Delta G^\circ = [\Delta\text{H}(\text{Rh-R}) + \Delta\text{H}(\text{Ph-H})] - [\Delta\text{H}(\text{R-H}) + \Delta\text{H}(\text{Rh-Ph})] - RT \ln(6/\#\text{H})$$

$$\Delta G^\circ = [\Delta\text{H}(\text{Rh-R}) - \Delta\text{H}(\text{Rh-Ph})] - [\Delta\text{H}(\text{R-H}) - \Delta\text{H}(\text{Ph-H})] - RT \ln(6/\#\text{H})$$

| Product                              | $D(\text{R-H})^a$ | $\Delta\Delta G_{\text{oa}}^\ddagger$ vs<br>PhH <sup>b</sup> | $\Delta G_{\text{re}}^\ddagger$ | $T_{\text{re}}(\text{R-H})$<br>(K) | $\Delta G^\circ$ vs<br>PhH | # H | $D_{\text{rel}}(\text{M-R})$ |
|--------------------------------------|-------------------|--------------------------------------------------------------|---------------------------------|------------------------------------|----------------------------|-----|------------------------------|
| phenyl                               | 112.9             | 0                                                            | 27.61                           | 303                                | 0                          | 6   | 0                            |
| CH <sub>2</sub> C(=O)CH <sub>3</sub> | 96.0              | 0.71                                                         | 27.71                           | 343                                | 0.21                       | 6   | -17.1                        |
| <b>3a</b>                            | 98.34             | 0.17                                                         | 23.88                           | 297                                | 3.97                       | 6   | -18.1                        |
| <b>3b</b>                            | 91.34             | 0.31                                                         | 25.57                           | 297                                | 2.42                       | 3   | -23.7                        |
| <b>3b'</b>                           | 98.94             | 0.37                                                         | 23.84                           | 297                                | 4.21                       | 3   | -17.8                        |
| <b>3c</b>                            | 85.34             | 1.65                                                         | 25.49                           | 313                                | 3.67                       | 4   | -30.8                        |
| <b>3d</b>                            | 91.22             | 1.25                                                         | 28.19                           | 343                                | 0.27                       | 3   | -21.5                        |
| <b>3e</b>                            | 90.22             | 0.48                                                         | 28.45                           | 343                                | -0.76                      | 3   | -21.5                        |
| <b>3f</b>                            | 90.67             | -                                                            | 24.29                           | 298                                | -                          | 3   | -                            |
| <b>3g</b>                            | 93.59             | 0.98                                                         | 28.21                           | 333                                | 0.08                       | 3   | -19.0                        |
| <b>3g'</b>                           | 95.95             | 1.09                                                         | 27.63                           | 333                                | 0.77                       | 3   | -17.3                        |
| <b>3h</b>                            | 94.63             | 1.55                                                         | 27.61                           | 333                                | 1.25                       | 3   | -19.1                        |
| <b>3i</b>                            | 96.83             | 0.63                                                         | 28.34                           | 333                                | -0.40                      | 6   | -15.7                        |

<sup>a</sup>All hydrocarbon C-H bond strengths were calculated using B3LYP/6-311g.

## 5. Gaussian Input

```
%mem=1500mb
%chk=/scratch/aolivare/diethylketone.chk
%NProcShared=12
#n B3LYP/6-311g opt freq scf=(maxcycles=10000) nosymm
```

diethylketone

0 1

|   |             |             |             |
|---|-------------|-------------|-------------|
| C | 0.08620690  | -0.09852217 | 0.00000000  |
| O | 0.71324555  | 0.99252716  | 0.00210835  |
| C | 0.85356407  | -1.43372364 | 0.00000000  |
| H | 0.15663780  | -2.24562923 | -0.00176057 |
| H | 1.46993096  | -1.49086305 | -0.87276969 |
| C | -1.45379093 | -0.09852092 | -0.00258904 |
| H | -1.80898766 | -0.60215948 | -0.87727953 |
| H | -1.81192521 | -0.60368694 | 0.87002034  |
| C | -1.96712476 | 1.35340478  | -0.00218280 |
| H | -1.61194137 | 1.85719497  | 0.87242579  |
| H | -1.60914647 | 1.85853922  | -0.87487446 |
| H | -3.03712338 | 1.35322509  | -0.00389446 |
| C | 1.73686620  | -1.51814950 | 1.25866978  |
| H | 2.09672591  | -2.51903889 | 1.37538060  |
| H | 2.56670399  | -0.85029271 | 1.15749397  |
| H | 1.16089132  | -1.24377638 | 2.11766473  |

## 6. X, Y, Z Coordinates Used for BDE (DFT) Calculations

Substrate 2a

|   |             |             |             |
|---|-------------|-------------|-------------|
| C | 0.08620690  | -0.09852217 | 0.00000000  |
| O | 0.71324555  | 0.99252716  | 0.00210835  |
| C | 0.85356407  | -1.43372364 | 0.00000000  |
| H | 0.15663780  | -2.24562923 | -0.00176057 |
| H | 1.46993096  | -1.49086305 | -0.87276969 |
| C | -1.45379093 | -0.09852092 | -0.00258904 |
| H | -1.80898766 | -0.60215948 | -0.87727953 |
| H | -1.81192521 | -0.60368694 | 0.87002034  |
| C | -1.96712476 | 1.35340478  | -0.00218280 |
| H | -1.61194137 | 1.85719497  | 0.87242579  |
| H | -1.60914647 | 1.85853922  | -0.87487446 |
| H | -3.03712338 | 1.35322509  | -0.00389446 |
| C | 1.73686620  | -1.51814950 | 1.25866978  |
| H | 2.09672591  | -2.51903889 | 1.37538060  |
| H | 2.56670399  | -0.85029271 | 1.15749397  |

|   |            |             |            |
|---|------------|-------------|------------|
| H | 1.16089132 | -1.24377638 | 2.11766473 |
|---|------------|-------------|------------|

Substrate 2b'

|   |             |             |             |
|---|-------------|-------------|-------------|
| C | 1.83497538  | -0.44334975 | 0.00000000  |
| O | 2.46201404  | 0.64769958  | 0.00210835  |
| C | 0.29497756  | -0.44334850 | -0.00258904 |
| H | -0.06021918 | -0.94698707 | -0.87727953 |
| H | -0.06315673 | -0.94851452 | 0.87002034  |
| H | -0.06168945 | 0.56545702  | -0.00230678 |
| C | 2.60233255  | -1.77855122 | 0.00000000  |
| H | 2.34105017  | -2.34008676 | 0.87253043  |
| H | 2.34441077  | -2.33815538 | -0.87476828 |
| C | 4.11695525  | -1.50014916 | 0.00322082  |
| H | 4.37486127  | -0.94046022 | 0.87793951  |
| H | 4.65011834  | -2.42785446 | 0.00331974  |
| H | 4.37825342  | -0.93869768 | -0.86935897 |

Substrate 2b'

Same coordinates as **2b** above.

Substrate 2c

|   |             |             |             |
|---|-------------|-------------|-------------|
| C | -0.91059599 | -0.06622516 | 0.00000000  |
| C | 0.61126201  | -0.06622516 | 0.00000000  |
| C | 1.08003501  | 1.38163984  | 0.00000000  |
| C | -1.37980199 | 1.37809484  | -0.10359000 |
| H | -1.30255799 | -0.66867016 | -0.85750800 |
| H | -1.30071099 | -0.53663616 | 0.93750400  |
| H | 0.99988901  | -0.60082316 | -0.90328000 |
| H | 1.00462901  | -0.60695716 | 0.89683700  |
| H | 1.62697001  | 1.61333284  | 0.94858800  |
| H | 1.79199601  | 1.56481584  | -0.84321600 |
| H | -2.03217999 | 1.63989684  | 0.76707400  |
| H | -1.99154799 | 1.52571684  | -1.02879300 |
| C | -0.14770499 | 2.27120784  | -0.13318600 |
| O | -0.14442610 | 3.52404496  | -0.25133398 |

Substrate 2d

|   |             |             |             |
|---|-------------|-------------|-------------|
| C | -0.62913904 | -0.44701986 | 0.00000000  |
| C | 0.87197596  | -0.44701986 | 0.00000000  |
| C | 0.12139096  | 0.85295514  | 0.00000000  |
| H | -1.16573504 | -0.75689486 | -0.91385800 |
| H | -1.16573504 | -0.75689486 | 0.91385800  |
| H | 1.40853696  | -0.75678686 | -0.91388800 |
| H | 1.40853696  | -0.75678686 | 0.91388800  |
| H | 0.12116796  | 1.47248314  | 0.91394400  |
| C | 0.12107992  | 1.71704808  | -1.27473263 |
| O | 0.12119782  | 2.97252663  | -1.18903462 |
| C | 0.12062305  | 1.04240066  | -2.65909193 |
| H | 0.99409341  | 0.43249541  | -2.75891734 |

|   |             |            |             |
|---|-------------|------------|-------------|
| H | -0.75320951 | 0.43295694 | -2.75856560 |
| H | 0.12066780  | 1.79300135 | -3.42165249 |

Substrate 2e

|   |             |             |             |
|---|-------------|-------------|-------------|
| C | 0.72847679  | -0.54635761 | 0.00000000  |
| O | 1.35551722  | 0.54469069  | -0.00211561 |
| C | -0.81152321 | -0.54635761 | 0.00000000  |
| H | -1.16818956 | -0.04348018 | -0.87453039 |
| H | -1.16818956 | -1.55516186 | 0.00176083  |
| H | -1.16819007 | -0.04043076 | 0.87276960  |
| C | 1.49583396  | -1.88155657 | 0.00258904  |
| H | 1.23616436  | -2.44047020 | 0.87728170  |
| H | 1.23629725  | -2.44378195 | -0.87001816 |
| C | 3.01045975  | -1.60315301 | 0.00217656  |
| H | 3.26999144  | -1.04090193 | 0.87476869  |
| H | 3.27013420  | -1.04426453 | -0.87253073 |
| C | 3.77781624  | -2.93835228 | 0.00480827  |
| C | 4.12616980  | -3.54503952 | -1.20227574 |
| C | 4.12467821  | -3.54111614 | 1.21390324  |
| C | 4.82063703  | -4.75455702 | -1.20016997 |
| H | 3.85189049  | -3.06996503 | -2.15533234 |
| C | 4.82022093  | -4.75050649 | 1.21618267  |
| H | 3.85035613  | -3.06299951 | 2.16536575  |
| C | 5.16810905  | -5.35734508 | 0.00942760  |
| H | 5.09469767  | -5.23313008 | -2.15156636 |
| H | 5.09393306  | -5.22532015 | 2.16965416  |
| H | 5.71572272  | -6.31097688 | 0.01083793  |

Substrate 2f

|    |             |             |             |
|----|-------------|-------------|-------------|
| C  | 0.01655629  | -0.94362773 | -0.01235276 |
| O  | 0.64359495  | 0.14742160  | -0.01024441 |
| C  | 0.78391346  | -2.27882920 | -0.01235276 |
| H  | 0.08698587  | -3.09073555 | -0.01235263 |
| H  | 1.39895899  | -2.33672801 | -0.88600414 |
| H  | 1.39895907  | -2.33672855 | 0.86129852  |
| C  | -1.52344153 | -0.94362648 | -0.01494180 |
| H  | -1.87863897 | -1.44799105 | -0.88921359 |
| H  | -1.88157653 | -1.44806689 | 0.85808695  |
| C  | -2.03677334 | 0.50829977  | -0.01574179 |
| H  | -1.67836998 | 1.01283486  | -0.88860568 |
| H  | -1.68184425 | 1.01256980  | 0.85869350  |
| Cl | -3.79676986 | 0.50830037  | -0.01924073 |

Substrate 2g

|   |             |             |             |
|---|-------------|-------------|-------------|
| C | 1.58866996  | -0.71422449 | -0.00934971 |
| O | 2.21571039  | 0.37682380  | -0.01146532 |
| C | 0.04866996  | -0.71422449 | -0.00934971 |
| H | -0.30799639 | -1.22030363 | -0.88203122 |
| H | -0.30799639 | -1.21694906 | 0.86526857  |



|   |             |             |             |
|---|-------------|-------------|-------------|
| H | -0.30799689 | 0.29457925  | -0.01128648 |
| C | 3.87065293  | -1.77102031 | -0.00738602 |
| H | 4.13030372  | -1.20874927 | 0.86515782  |
| H | 4.40381621  | -2.69872380 | -0.00560887 |
| H | 4.13020828  | -1.21215198 | -0.88214152 |
| O | 2.35602713  | -2.04942346 | -0.00676068 |

Substrate 2g'

Same coordinates as 2g above.

Substrate 2h

|   |             |             |             |
|---|-------------|-------------|-------------|
| C | 1.80463568  | -1.05951183 | -0.01386977 |
| O | 2.43167611  | 0.03153851  | -0.01386977 |
| O | 2.51718162  | -2.29934177 | -0.01386977 |
| C | 1.58631920  | -3.38488088 | -0.01386977 |
| H | 2.11994772  | -4.31231648 | -0.01582603 |
| H | 0.97253145  | -3.32839367 | 0.86075803  |
| H | 0.96995929  | -3.32618868 | -0.88654134 |
| C | 0.26463568  | -1.05951183 | -0.01386977 |
| H | -0.09203067 | -1.56356997 | -0.88772017 |
| H | -0.09203067 | -1.56425918 | 0.85958271  |
| C | -0.24869792 | 0.39241388  | -0.01329707 |
| H | 0.10945702  | 0.89768687  | -0.88583603 |
| H | 0.10647890  | 0.89594527  | 0.86146322  |
| C | -1.78869569 | 0.39241493  | -0.01592135 |
| H | -2.14684946 | -0.11318219 | 0.85643031  |
| H | -2.14536318 | 1.40122002  | -0.01514960 |
| H | -2.14387242 | -0.11079232 | -0.89086818 |

Substrate 2i

|   |             |             |             |
|---|-------------|-------------|-------------|
| C | 1.05960260  | -0.84437085 | 0.00000000  |
| O | 1.68664303  | 0.24667950  | 0.00000000  |
| O | 1.77214854  | -2.08420079 | 0.00000000  |
| O | -0.37039740 | -0.84437085 | 0.00000000  |
| C | 0.84128612  | -3.16973990 | 0.00002588  |
| H | 0.23887503  | -3.12302936 | -0.88304773 |
| H | 1.37477798  | -4.09705785 | 0.01920544  |
| H | 0.21368621  | -3.10138867 | 0.86393933  |
| C | -0.84774121 | -0.55505496 | -1.31656341 |
| H | -1.77800286 | -1.05870128 | -1.47735408 |
| H | -0.99094002 | 0.50024905  | -1.42013730 |
| H | -0.13145390 | -0.89023164 | -2.03731932 |

Substrate 2a•

|   |            |             |             |
|---|------------|-------------|-------------|
| C | 0.08620690 | -0.09852217 | 0.00000000  |
| O | 0.71324555 | 0.99252716  | 0.00210835  |
| C | 0.85356407 | -1.43372364 | 0.00000000  |
| H | 0.15663780 | -2.24562923 | -0.00176057 |
| H | 1.46993096 | -1.49086305 | -0.87276969 |

|   |             |             |             |
|---|-------------|-------------|-------------|
| C | -1.45379093 | -0.09852092 | -0.00258904 |
| H | -1.80898766 | -0.60215948 | -0.87727953 |
| H | -1.81192521 | -0.60368694 | 0.87002034  |
| C | -1.96712476 | 1.35340478  | -0.00218280 |
| H | -1.61194137 | 1.85719497  | 0.87242579  |
| H | -1.60914647 | 1.85853922  | -0.87487446 |
| H | -3.03712338 | 1.35322509  | -0.00389446 |
| C | 1.73686620  | -1.51814950 | 1.25866978  |
| H | 2.09672591  | -2.51903889 | 1.37538060  |
| H | 1.16089132  | -1.24377638 | 2.11766473  |

Substrate 2b'

|   |             |             |             |
|---|-------------|-------------|-------------|
| C | 1.83497538  | -0.44334975 | 0.00000000  |
| O | 2.46201404  | 0.64769958  | 0.00210835  |
| C | 0.29497756  | -0.44334850 | -0.00258904 |
| H | -0.06021918 | -0.94698707 | -0.87727953 |
| H | -0.06315673 | -0.94851452 | 0.87002034  |
| C | 2.60233255  | -1.77855122 | 0.00000000  |
| H | 2.34105017  | -2.34008676 | 0.87253043  |
| H | 2.34441077  | -2.33815538 | -0.87476828 |
| C | 4.11695525  | -1.50014916 | 0.00322082  |
| H | 4.37486127  | -0.94046022 | 0.87793951  |
| H | 4.65011834  | -2.42785446 | 0.00331974  |
| H | 4.37825342  | -0.93869768 | -0.86935897 |

Substrate 2b

|   |             |             |             |
|---|-------------|-------------|-------------|
| C | 1.83497538  | -0.44334975 | 0.00000000  |
| O | 2.46201404  | 0.64769958  | 0.00210835  |
| C | 0.29497756  | -0.44334850 | -0.00258904 |
| H | -0.06021918 | -0.94698707 | -0.87727953 |
| H | -0.06315673 | -0.94851452 | 0.87002034  |
| H | -0.06168945 | 0.56545702  | -0.00230678 |
| C | 2.60233255  | -1.77855122 | 0.00000000  |
| H | 2.34105017  | -2.34008676 | 0.87253043  |
| H | 2.34441077  | -2.33815538 | -0.87476828 |
| C | 4.11695525  | -1.50014916 | 0.00322082  |
| H | 4.37486127  | -0.94046022 | 0.87793951  |
| H | 4.65011834  | -2.42785446 | 0.00331974  |

Substrate 2c

|   |             |             |             |
|---|-------------|-------------|-------------|
| C | -0.91059599 | -0.06622516 | 0.00000000  |
| C | 0.61126201  | -0.06622516 | 0.00000000  |
| C | 1.08003501  | 1.38163984  | 0.00000000  |
| C | -1.37980199 | 1.37809484  | -0.10359000 |
| H | -1.30255799 | -0.66867016 | -0.85750800 |
| H | -1.30071099 | -0.53663616 | 0.93750400  |
| H | 0.99988901  | -0.60082316 | -0.90328000 |
| H | 1.00462901  | -0.60695716 | 0.89683700  |
| H | 1.62697001  | 1.61333284  | 0.94858800  |

|   |             |            |             |
|---|-------------|------------|-------------|
| H | -2.03217999 | 1.63989684 | 0.76707400  |
| H | -1.99154799 | 1.52571684 | -1.02879300 |
| C | -0.14770499 | 2.27120784 | -0.13318600 |
| O | -0.14442610 | 3.52404496 | -0.25133398 |

Substrate 2d•

|   |             |             |             |
|---|-------------|-------------|-------------|
| C | -0.62913904 | -0.44701986 | 0.00000000  |
| C | 0.87197596  | -0.44701986 | 0.00000000  |
| C | 0.12139096  | 0.85295514  | 0.00000000  |
| H | -1.16573504 | -0.75689486 | -0.91385800 |
| H | -1.16573504 | -0.75689486 | 0.91385800  |
| H | 1.40853696  | -0.75678686 | -0.91388800 |
| H | 1.40853696  | -0.75678686 | 0.91388800  |
| H | 0.12116796  | 1.47248314  | 0.91394400  |
| C | 0.12107992  | 1.71704808  | -1.27473263 |
| O | 0.12119782  | 2.97252663  | -1.18903462 |
| C | 0.12062305  | 1.04240066  | -2.65909193 |
| H | 0.99409341  | 0.43249541  | -2.75891734 |
| H | -0.75320951 | 0.43295694  | -2.75856560 |

Substrate 2e•

|   |             |             |             |
|---|-------------|-------------|-------------|
| C | 0.72847679  | -0.54635761 | 0.00000000  |
| O | 1.35551722  | 0.54469069  | -0.00211561 |
| C | -0.81152321 | -0.54635761 | 0.00000000  |
| H | -1.16818956 | -0.04348018 | -0.87453039 |
| H | -1.16818956 | -1.55516186 | 0.00176083  |
| C | 1.49583396  | -1.88155657 | 0.00258904  |
| H | 1.23616436  | -2.44047020 | 0.87728170  |
| H | 1.23629725  | -2.44378195 | -0.87001816 |
| C | 3.01045975  | -1.60315301 | 0.00217656  |
| H | 3.26999144  | -1.04090193 | 0.87476869  |
| H | 3.27013420  | -1.04426453 | -0.87253073 |
| C | 3.77781624  | -2.93835228 | 0.00480827  |
| C | 4.12616980  | -3.54503952 | -1.20227574 |
| C | 4.12467821  | -3.54111614 | 1.21390324  |
| C | 4.82063703  | -4.75455702 | -1.20016997 |
| H | 3.85189049  | -3.06996503 | -2.15533234 |
| C | 4.82022093  | -4.75050649 | 1.21618267  |
| H | 3.85035613  | -3.06299951 | 2.16536575  |
| C | 5.16810905  | -5.35734508 | 0.00942760  |
| H | 5.09469767  | -5.23313008 | -2.15156636 |
| H | 5.09393306  | -5.22532015 | 2.16965416  |
| H | 5.71572272  | -6.31097688 | 0.01083793  |

Substrate 2f•

|   |            |             |             |
|---|------------|-------------|-------------|
| C | 0.01655629 | -0.94362773 | -0.01235276 |
| O | 0.64359495 | 0.14742160  | -0.01024441 |
| C | 0.78391346 | -2.27882920 | -0.01235276 |
| H | 0.08698587 | -3.09073555 | -0.01235263 |

|    |             |             |             |
|----|-------------|-------------|-------------|
| H  | 1.39895907  | -2.33672855 | 0.86129852  |
| C  | -1.52344153 | -0.94362648 | -0.01494180 |
| H  | -1.87863897 | -1.44799105 | -0.88921359 |
| H  | -1.88157653 | -1.44806689 | 0.85808695  |
| C  | -2.03677334 | 0.50829977  | -0.01574179 |
| H  | -1.67836998 | 1.01283486  | -0.88860568 |
| H  | -1.68184425 | 1.01256980  | 0.85869350  |
| Cl | -3.79676986 | 0.50830037  | -0.01924073 |

Substrate 2g•

|   |             |             |             |
|---|-------------|-------------|-------------|
| C | 1.58866996  | -0.71422449 | -0.00934971 |
| O | 2.21571039  | 0.37682380  | -0.01146532 |
| C | 0.04866996  | -0.71422449 | -0.00934971 |
| H | -0.30799639 | -1.22030363 | -0.88203122 |
| H | -0.30799639 | -1.21694906 | 0.86526857  |
| C | 3.87065293  | -1.77102031 | -0.00738602 |
| H | 4.13030372  | -1.20874927 | 0.86515782  |
| H | 4.40381621  | -2.69872380 | -0.00560887 |
| H | 4.13020828  | -1.21215198 | -0.88214152 |
| O | 2.35602713  | -2.04942346 | -0.00676068 |

Substrate 2g'•

|   |             |             |             |
|---|-------------|-------------|-------------|
| C | 1.58866996  | -0.71422449 | -0.00934971 |
| O | 2.21571039  | 0.37682380  | -0.01146532 |
| C | 0.04866996  | -0.71422449 | -0.00934971 |
| H | -0.30799639 | -1.22030363 | -0.88203122 |
| H | -0.30799639 | -1.21694906 | 0.86526857  |
| H | -0.30799689 | 0.29457925  | -0.01128648 |
| C | 3.87065293  | -1.77102031 | -0.00738602 |
| H | 4.13030372  | -1.20874927 | 0.86515782  |
| H | 4.40381621  | -2.69872380 | -0.00560887 |
| O | 2.35602713  | -2.04942346 | -0.00676068 |

Substrate 2h•

|   |             |             |             |
|---|-------------|-------------|-------------|
| C | 1.80463568  | -1.05951183 | -0.01386977 |
| O | 2.43167611  | 0.03153851  | -0.01386977 |
| O | 2.51718162  | -2.29934177 | -0.01386977 |
| C | 1.58631920  | -3.38488088 | -0.01386977 |
| H | 0.97253145  | -3.32839367 | 0.86075803  |
| H | 0.96995929  | -3.32618868 | -0.88654134 |
| C | 0.26463568  | -1.05951183 | -0.01386977 |
| H | -0.09203067 | -1.56356997 | -0.88772017 |
| H | -0.09203067 | -1.56425918 | 0.85958271  |
| C | -0.24869792 | 0.39241388  | -0.01329707 |
| H | 0.10945702  | 0.89768687  | -0.88583603 |
| H | 0.10647890  | 0.89594527  | 0.86146322  |
| C | -1.78869569 | 0.39241493  | -0.01592135 |
| H | -2.14684946 | -0.11318219 | 0.85643031  |
| H | -2.14536318 | 1.40122002  | -0.01514960 |

|   |             |             |             |
|---|-------------|-------------|-------------|
| H | -2.14387242 | -0.11079232 | -0.89086818 |
|---|-------------|-------------|-------------|

Substrate 2i•

|   |             |             |             |
|---|-------------|-------------|-------------|
| C | 1.05960260  | -0.84437085 | 0.00000000  |
| O | 1.68664303  | 0.24667950  | 0.00000000  |
| O | 1.77214854  | -2.08420079 | 0.00000000  |
| O | -0.37039740 | -0.84437085 | 0.00000000  |
| C | 0.84128612  | -3.16973990 | 0.00002588  |
| H | 0.23887503  | -3.12302936 | -0.88304773 |
| H | 1.37477798  | -4.09705785 | 0.01920544  |
| H | 0.21368621  | -3.10138867 | 0.86393933  |
| C | -0.84774121 | -0.55505496 | -1.31656341 |
| H | -1.77800286 | -1.05870128 | -1.47735408 |
| H | -0.13145390 | -0.89023164 | -2.03731932 |

Hydrogen atom H•

|   |            |             |            |
|---|------------|-------------|------------|
| H | 3.43167708 | -2.06521736 | 0.00000000 |
|---|------------|-------------|------------|
